# Supplementary material for: Whooping Cough Cases Increase in Central Italy after COVID-19 Pandemic
Source: MDPI journal article supplement (doi:10.3390/antibiotics13050464), 2024-05-19
Supplement: s1 [file s1]

## Patient #1

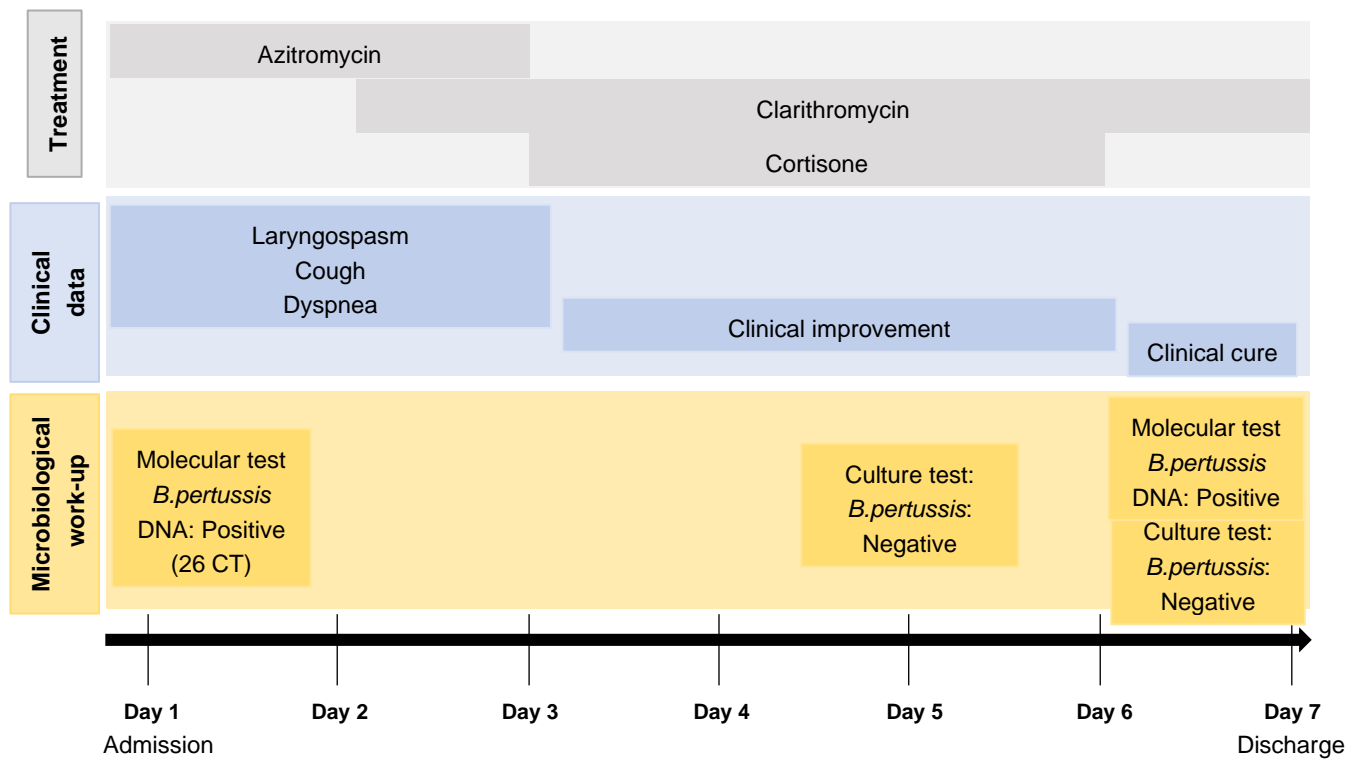

## Patient #2

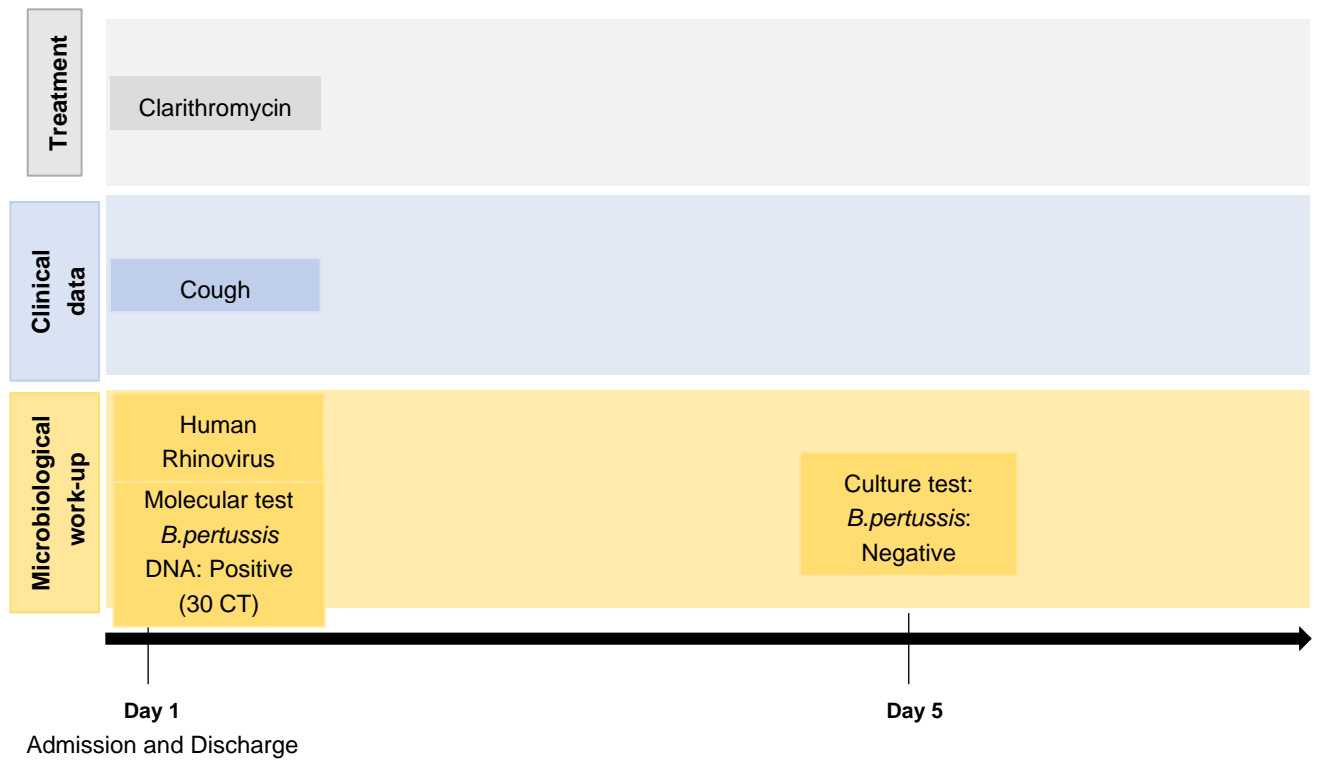

### Patient #3

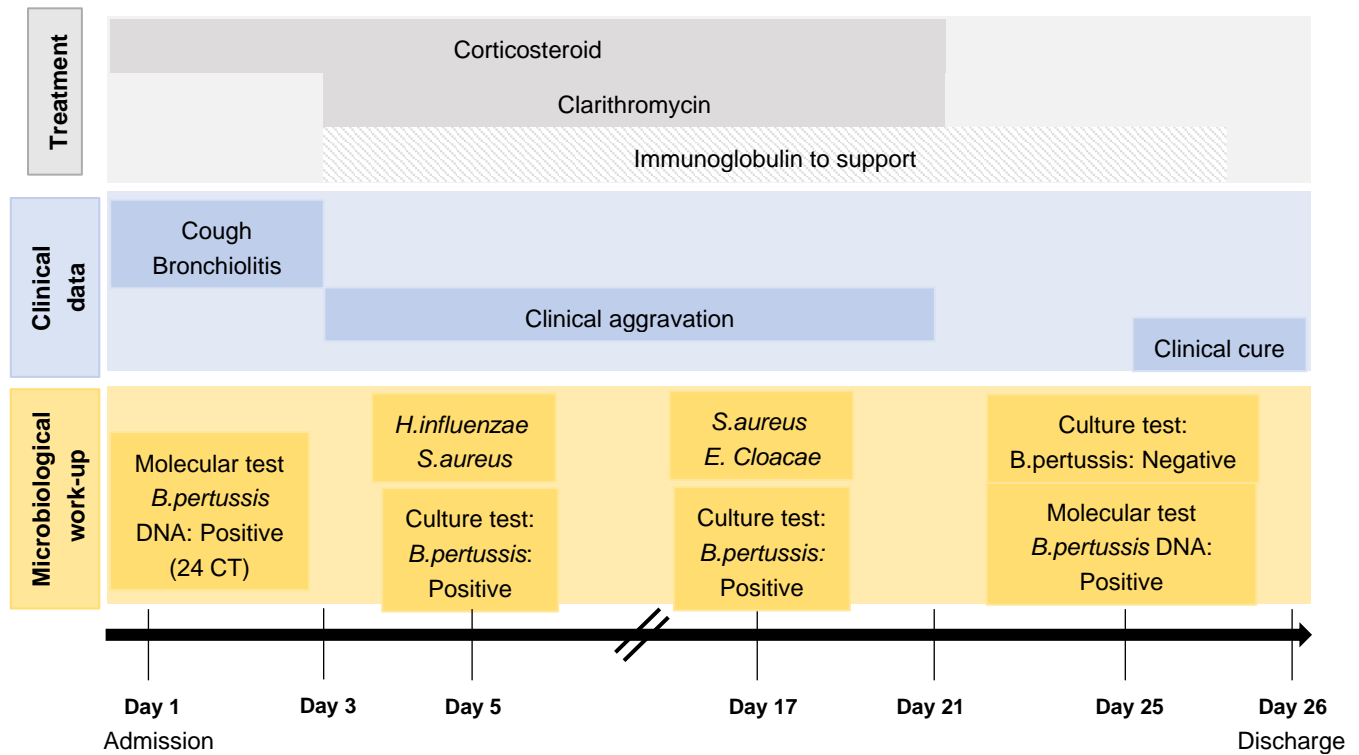

### Patient #4

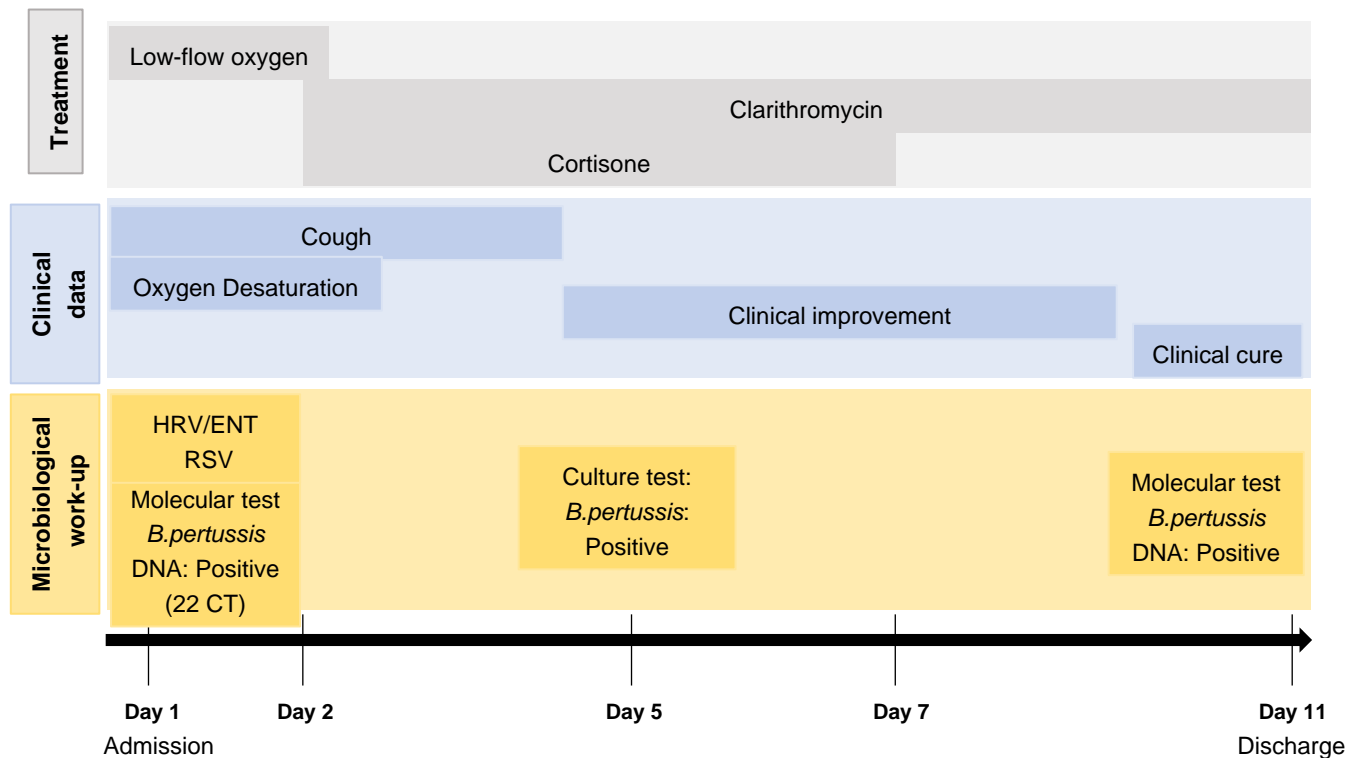

## Patient #5

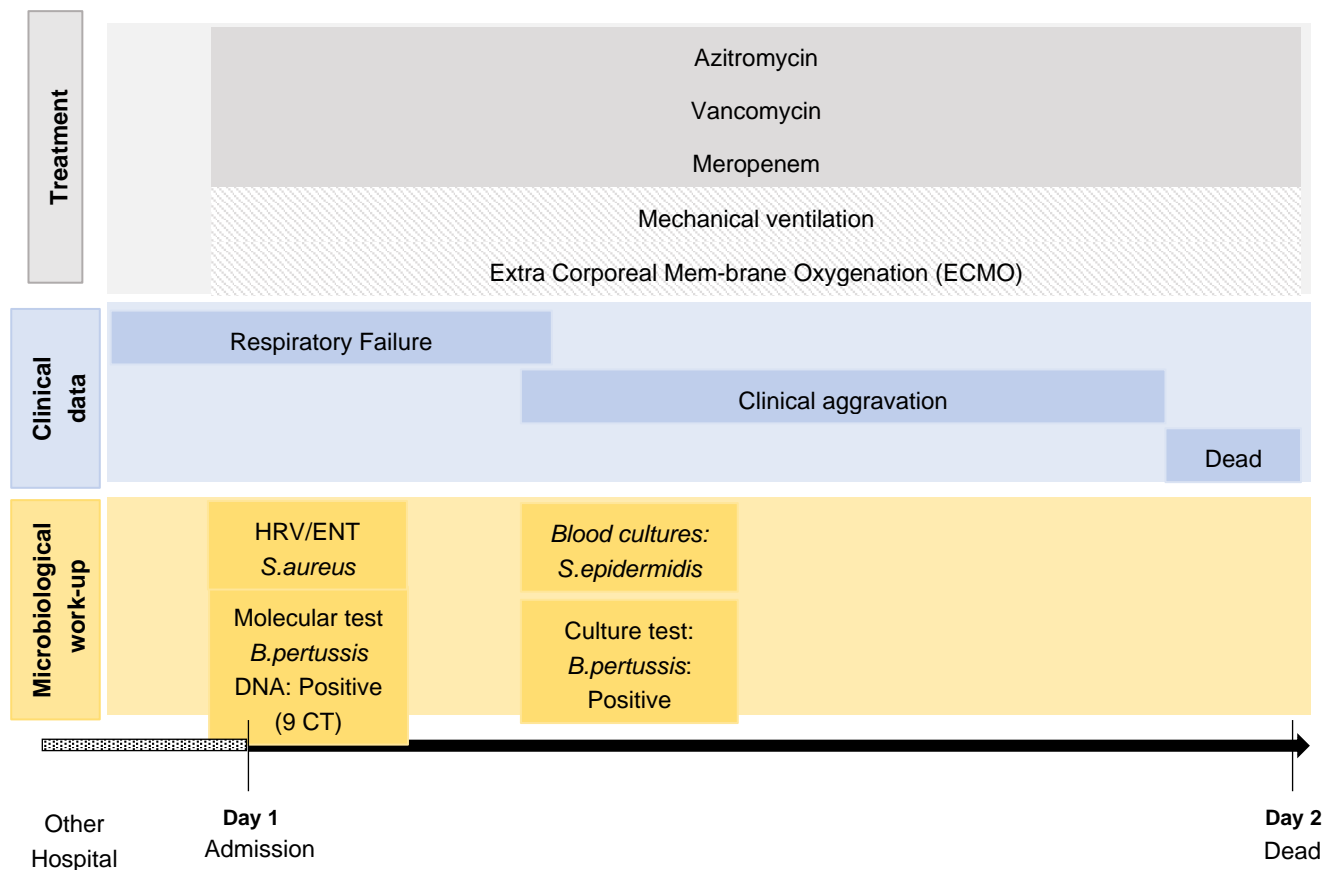

**Supplementary File S1:** Timeline portraying the patient's microbiological and clinical history.

Abbreviation: CT: cycle threshold; HRV/ENT: Rhinovirus/Enterovirus; RSV: Respiratory Syncytial virus.
